# Supplementary material
Source: MDPI journal article supplement (https://www.mdpi.com/2073-4395/13/2/435)
Supplement: s1 [file s1]

# Capsaicinoids Content in the Pericarp and Placenta of Bolilla Peppers (*Capsicum annuum* L.) Throughout the Ripening of the Fruit at Two Different Stages of Plant Maturation

Mercedes Vázquez-Espinosa <sup>†</sup>, María Álvarez-Romero <sup>†</sup>, Ana V. González-de-Peredo, Ana Ruíz-Rodríguez, Marta Ferreiro-González, Gerardo F. Barbero <sup>\*</sup> and Miguel Palma

## SUPPLEMENTARY MATERIAL

**Table S1.** Fertirrigation applied to the ppeper plants.

| Phenology              | Fortnight       | Irrigation<br>(m <sup>3</sup> /ha) | N<br>(kg/ha) | P <sub>2</sub> O <sub>5</sub><br>(kg/ha) | K <sub>2</sub> O<br>(kg/ha) | CaO<br>(kg/ha) | MgO<br>(kg/ha) |
|------------------------|-----------------|------------------------------------|--------------|------------------------------------------|-----------------------------|----------------|----------------|
| Vegetative Development | 1 <sup>a</sup>  | 105                                | 8            | 6                                        | 8                           | 2              | 2              |
|                        | 2 <sup>a</sup>  | 240                                | 8            | 6                                        | 8                           | 2              | 2              |
| Flowering/Fruition     | 3 <sup>a</sup>  | 350                                | 8            | 6                                        | 8                           | 2              | 2              |
|                        | 4 <sup>a</sup>  | 380                                | 8            | 6                                        | 8                           | 2              | 2              |
| Development/Ripening   | 5 <sup>a</sup>  | 340                                | 15           | 15                                       | 20                          | 7              | 2              |
|                        | 6 <sup>a</sup>  | 255                                | 15           | 15                                       | 20                          | 7              | 2              |
| Full Production        | 7 <sup>a</sup>  | 200                                | 23           | 16                                       | 33                          | 11             | 7              |
|                        | 8 <sup>a</sup>  | 200                                | 25           | 15                                       | 35                          | 14             | 9              |
|                        | 9 <sup>a</sup>  | 180                                | 25           | 15                                       | 35                          | 14             | 9              |
|                        | 10 <sup>a</sup> | 170                                | 25           | 15                                       | 35                          | 14             | 8              |
|                        | 11 <sup>a</sup> | 165                                | 25           | 10                                       | 35                          | 7              | 8              |
|                        | 12 <sup>a</sup> | 170                                | 25           | 10                                       | 35                          | 7              | 8              |
|                        | 13 <sup>a</sup> | 185                                | 25           | 10                                       | 35                          | 7              | 8              |
|                        | 14 <sup>a</sup> | 210                                | 25           | 10                                       | 35                          | 7              | 8              |
